# Supplementary material for: CAncer bioMarker Prediction Pipeline (CAMPP)—A standardized framework for the analysis of quantitative biological data
Source: PubMed Central journal article supplement (PMC7108742; doi:10.1371/journal.pcbi.1007665), 2020-03-16
Supplement: pcbi.1007665.s001.pdf [file pcbi.1007665.s001.pdf]

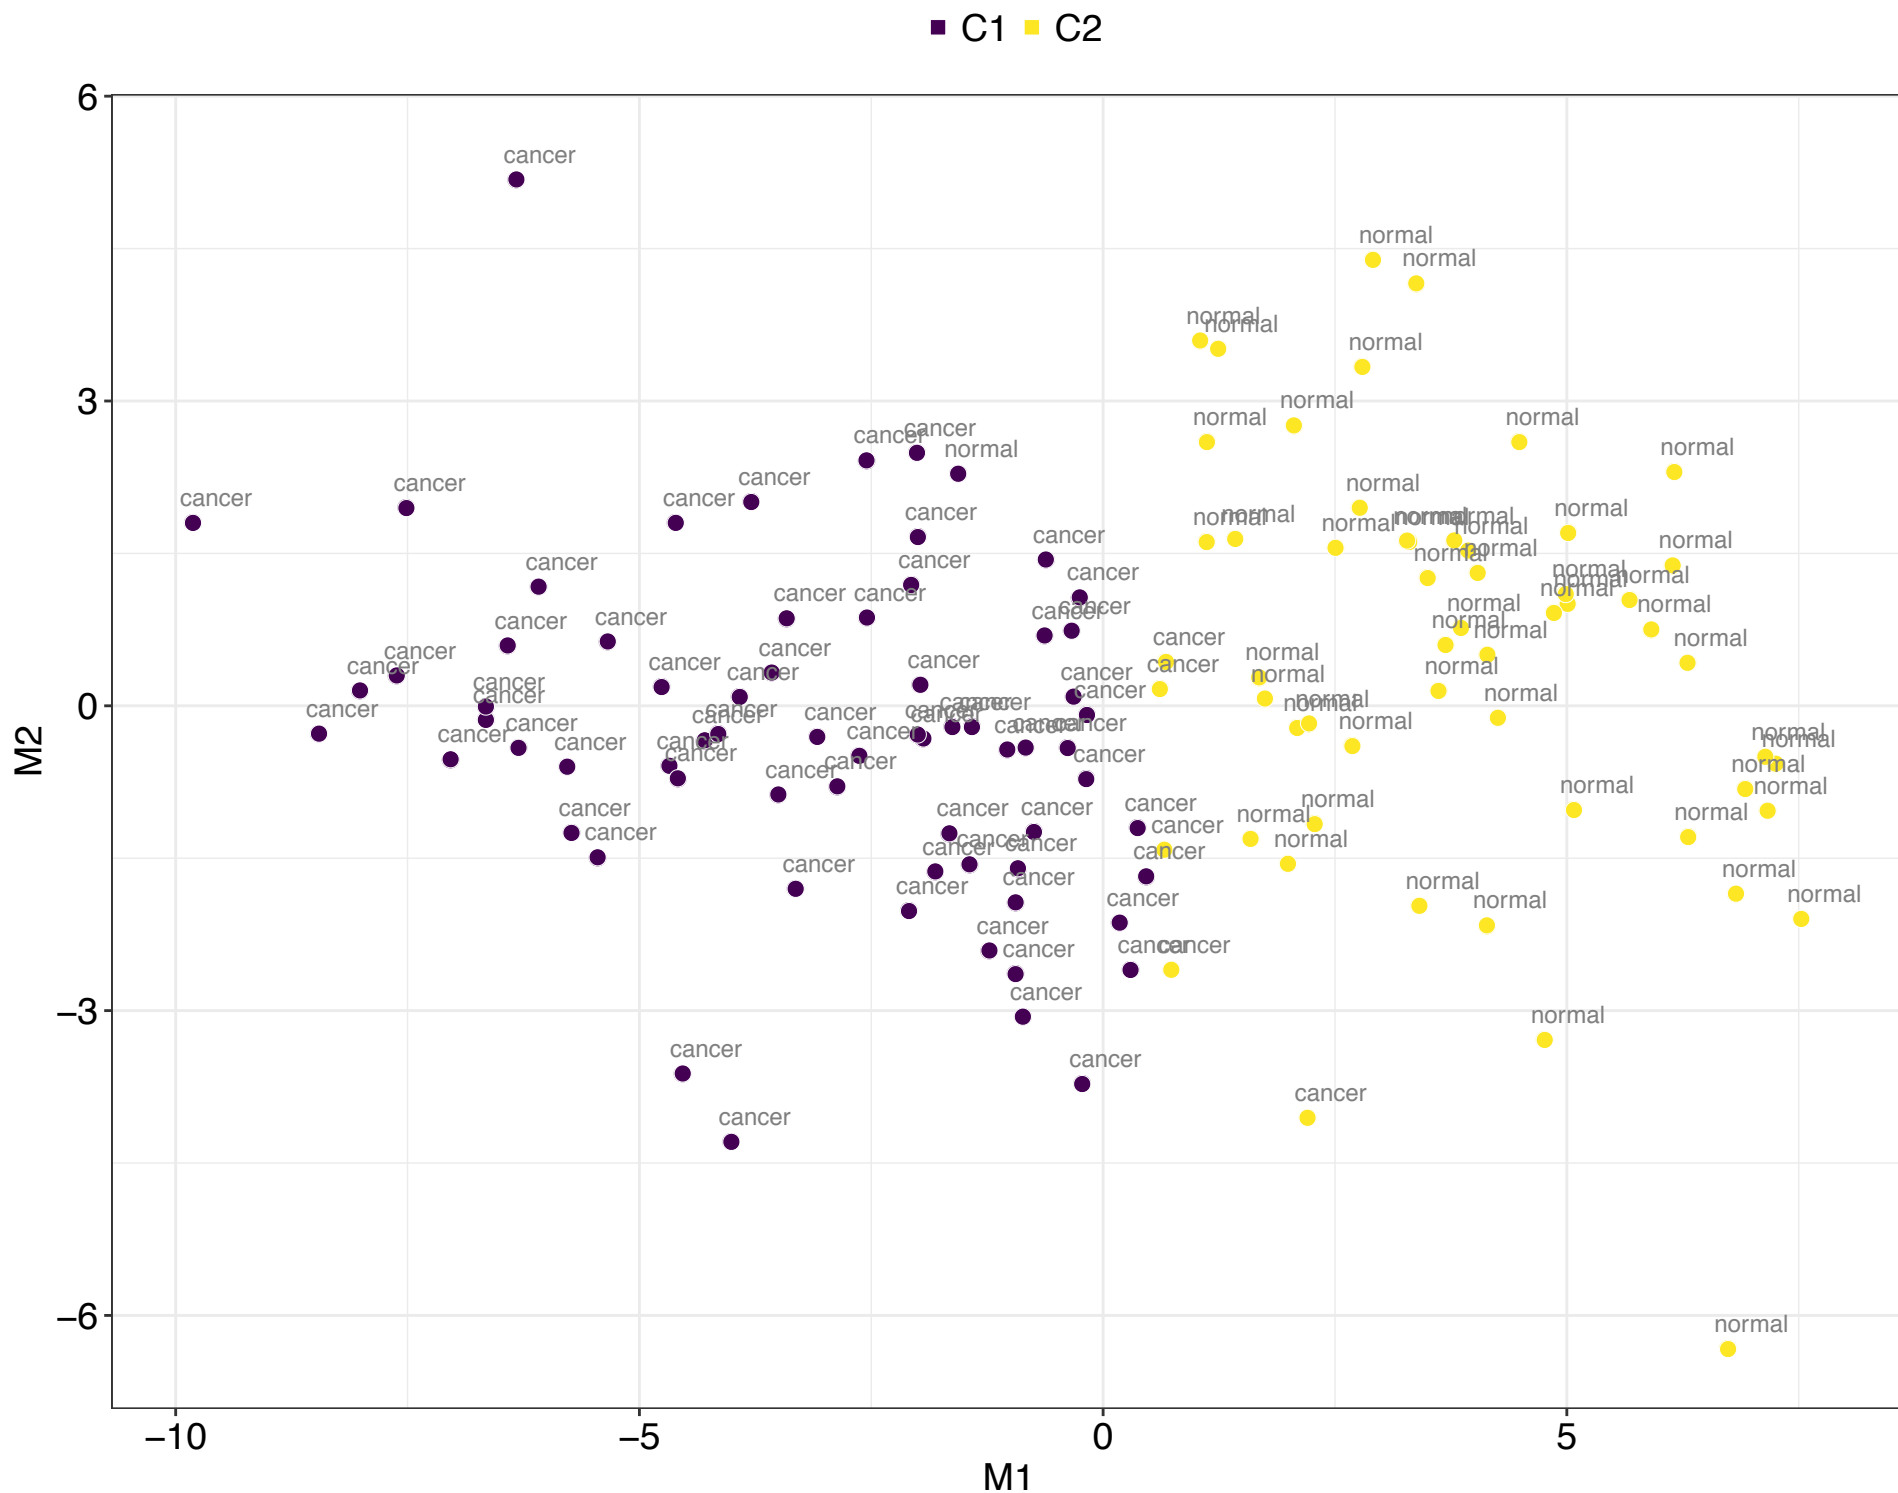

**Supplementary Figure 1:** Multidimensional scaling plot showing the result of k-means clustering with  $k = 2$ . The two clusters support the anticipated difference between N-glycan abundances in normal interstitial fluid vs tumour interstitial fluid samples.
